# Supplementary material
Source: PubMed Central journal article supplement (PMC6205762)
Supplement: NIHMS1503243-supplement-1.pdf [file NIHMS1503243-supplement-1.pdf]

## **SUPPLEMENTAL MATERIAL**

### **Associations of circulating protein levels with lipid fractions in the general population**

Sylwia M Figarska<sup>1,2</sup>, Stefan Gustafsson<sup>3</sup>, Johan Sundström<sup>4,5</sup>, Johan Ärnlöv<sup>6,7</sup>, Anders Mälarstig<sup>8,9</sup>, Sölve Elmståhl<sup>10</sup>, Tove Fall<sup>3</sup>, Lars Lind<sup>4</sup>, Erik Ingelsson<sup>1,2,3</sup>

**Running Title:** Proteomics and lipid levels in general population

#### **Supplemental material:**

Supplementary Table I

Supplementary Table II

Supplementary Table III

Supplementary Table IV

**Supplementary Table I.** Associations between protein biomarkers and lipid levels in age and sex adjusted model.

| <b>TRIGLYCERIDES (TG)</b>                                 |           |       |          |             |         |          |
|-----------------------------------------------------------|-----------|-------|----------|-------------|---------|----------|
|                                                           | EpiHealth |       |          | PIVUS+ULSAM |         |          |
| Marker                                                    | Beta      | SE    | P        | Beta meta   | SE meta | P meta   |
| Tissue-type plasminogen activator (t-PA)                  | 0.380     | 0.020 | 3.33E-77 | 0.296       | 0.025   | 1.77E-30 |
| Interleukin-1 receptor antagonist protein (IL-1RA)        | 0.387     | 0.021 | 1.07E-68 | 0.308       | 0.025   | 3.44E-32 |
| Fatty acid-binding protein 4 (FABP4)                      | 0.332     | 0.019 | 7.98E-67 | 0.318       | 0.023   | 2.65E-39 |
| Leptin (LEP)                                              | 0.304     | 0.018 | 6.07E-61 | 0.243       | 0.023   | 2.07E-25 |
| Cathepsin D (CTSD)                                        | 0.267     | 0.022 | 3.24E-33 | 0.265       | 0.026   | 3.52E-24 |
| Growth hormone (GH)                                       | -0.231    | 0.020 | 3.95E-31 | -0.128      | 0.025   | 5.88E-07 |
| Adrenomedullin (AM)                                       | 0.221     | 0.020 | 6.22E-27 | 0.136       | 0.026   | 2.36E-07 |
| E-selectin (SELE)                                         | 0.235     | 0.022 | 1.18E-26 | 0.188       | 0.026   | 9.79E-13 |
| C-C motif chemokine 3 (CCL3)                              | 0.218     | 0.022 | 2.90E-23 | 0.197       | 0.026   | 6.52E-14 |
| Kidney Injury Molecule-1 (KIM-1)                          | 0.206     | 0.021 | 8.13E-23 | 0.182       | 0.026   | 5.06E-12 |
| Fibroblast growth factor 23 (FGF-23)                      | 0.216     | 0.022 | 2.61E-22 | 0.178       | 0.026   | 1.77E-11 |
| Chitinase-3-like protein 1 (CHI3L1)                       | 0.199     | 0.021 | 1.68E-21 | 0.171       | 0.026   | 1.12E-10 |
| Interleukin-6 (IL-6)                                      | 0.205     | 0.022 | 4.60E-21 | 0.098       | 0.026   | 2.17E-04 |
| Agouti-related protein (AGRP)                             | 0.209     | 0.022 | 1.52E-20 | 0.006       | 0.026   | 8.08E-01 |
| Tumor necrosis factor receptor superfamily member 6 (FAS) | 0.187     | 0.021 | 6.90E-19 | 0.142       | 0.026   | 9.37E-08 |
| Urokinase plasminogen activator surface receptor (uPAR)   | 0.179     | 0.021 | 5.97E-18 | 0.061       | 0.027   | 2.16E-02 |
| Placenta growth factor (PlGF)                             | 0.176     | 0.020 | 6.30E-18 | 0.157       | 0.026   | 1.65E-09 |
| Interleukin-18 (IL-18)                                    | 0.186     | 0.022 | 1.47E-17 | 0.160       | 0.026   | 9.69E-10 |
| Stem cell factor (SCF)                                    | -0.194    | 0.023 | 1.52E-17 | -0.163      | 0.026   | 7.14E-10 |
| Tumor necrosis factor receptor 1 (TNF-R1)                 | 0.177     | 0.021 | 6.92E-17 | 0.194       | 0.026   | 1.93E-13 |
| Galectin-3 (Gal-3)                                        | 0.172     | 0.021 | 3.60E-16 | 0.193       | 0.025   | 3.64E-14 |
| Monocyte chemoattractant protein 1 (MCP-1)                | 0.168     | 0.021 | 5.75E-15 | 0.115       | 0.026   | 1.44E-05 |
| P-selectin glycoprotein ligand 1 (PSGL-1)                 | 0.176     | 0.022 | 9.05E-15 | 0.098       | 0.026   | 2.12E-04 |
| Lectin-like oxidized LDL receptor 1 (LOX-1)               | 0.162     | 0.022 | 3.62E-13 | 0.132       | 0.026   | 6.36E-07 |
| Interleukin-16 (IL-16)                                    | 0.159     | 0.022 | 8.71E-13 | 0.134       | 0.026   | 4.11E-07 |
| C-X-C motif chemokine 16 (CXCL16)                         | 0.156     | 0.022 | 1.16E-12 | 0.106       | 0.026   | 5.67E-05 |

|                                                             |        |       |          |        |       |          |
|-------------------------------------------------------------|--------|-------|----------|--------|-------|----------|
| Interleukin-6 receptor subunit alpha (IL-6RA)               | 0.142  | 0.022 | 2.08E-10 | 0.124  | 0.026 | 2.84E-06 |
| TNF-related apoptosis-inducing ligand receptor 2 (TRAIL-R2) | 0.128  | 0.021 | 6.62E-10 | 0.201  | 0.026 | 2.72E-14 |
| Tumor necrosis factor receptor 2 (TNF-R2)                   | 0.129  | 0.021 | 2.14E-09 | 0.165  | 0.026 | 4.29E-10 |
| Resistin (RETN)                                             | 0.110  | 0.022 | 9.08E-07 | 0.130  | 0.026 | 9.02E-07 |
| Myeloperoxidase (MPO)                                       | 0.108  | 0.022 | 1.49E-06 | 0.043  | 0.027 | 1.04E-01 |
| Growth/differentiation factor 15 (GDF-15)                   | 0.087  | 0.018 | 2.13E-06 | 0.160  | 0.026 | 1.08E-09 |
| Vascular endothelial growth factor D (VEGF-D)               | -0.101 | 0.022 | 7.01E-06 | -0.099 | 0.026 | 1.80E-04 |
| Osteoprotegerin (OPG)                                       | 0.081  | 0.020 | 6.41E-05 | 0.026  | 0.027 | 3.34E-01 |
| Matrix metalloproteinase-12 (MMP-12)                        | 0.081  | 0.021 | 1.09E-04 | 0.173  | 0.026 | 6.29E-11 |
| Dickkopf-related protein 1 (DKK-1)                          | 0.087  | 0.023 | 1.12E-04 | 0.072  | 0.026 | 6.83E-03 |
| Renin (REN)                                                 | 0.085  | 0.022 | 1.27E-04 | 0.136  | 0.026 | 2.13E-07 |
| Heparin-binding EGF-like growth factor (HB-EGF)             | 0.084  | 0.023 | 2.14E-04 | 0.136  | 0.026 | 2.79E-07 |
| Tissue factor (TF)                                          | -0.080 | 0.022 | 2.69E-04 | 0.013  | 0.027 | 6.17E-01 |
| Platelet-derived growth factor subunit B (PDGF subunit B)   | 0.082  | 0.023 | 3.64E-04 | 0.098  | 0.026 | 1.96E-04 |
| Thrombomodulin (TM)                                         | 0.077  | 0.022 | 5.34E-04 | 0.087  | 0.026 | 1.04E-03 |
| Follistatin (FS)                                            | 0.072  | 0.022 | 1.14E-03 | 0.157  | 0.026 | 2.78E-09 |
| Proto-oncogene tyrosine-protein kinase Src (SRC)            | 0.064  | 0.023 | 5.36E-03 | 0.078  | 0.027 | 3.43E-03 |
| Platelet endothelial cell adhesion molecule (PECAM-1)       | 0.062  | 0.022 | 5.74E-03 | 0.039  | 0.027 | 1.45E-01 |
| CD40L receptor (CD40)                                       | 0.060  | 0.023 | 8.52E-03 | 0.066  | 0.027 | 1.36E-02 |
| Interleukin-27 subunit alpha (IL27-A)                       | -0.060 | 0.023 | 8.70E-03 | 0.015  | 0.027 | 5.82E-01 |
| Pappalysin-1 (PAPPA)                                        | -0.046 | 0.021 | 3.21E-02 | 0.011  | 0.026 | 6.83E-01 |
| Receptor for advanced glycosylation end products (RAGE)     | -0.045 | 0.023 | 4.59E-02 | 0.023  | 0.026 | 3.83E-01 |
| Angiopoietin-1 receptor (TIE2)                              | 0.044  | 0.023 | 5.54E-02 | 0.113  | 0.026 | 1.97E-05 |
| Proteinase-activated receptor 1 (PAR-1)                     | 0.038  | 0.023 | 9.38E-02 | 0.058  | 0.027 | 2.76E-02 |
| Spondin-1 (SPON1)                                           | 0.036  | 0.022 | 9.62E-02 | 0.079  | 0.026 | 2.84E-03 |
| Myoglobin (MB)                                              | 0.033  | 0.020 | 1.04E-01 | 0.031  | 0.025 | 2.30E-01 |
| Cathepsin L1 (CTSL1)                                        | 0.032  | 0.022 | 1.52E-01 | 0.060  | 0.027 | 2.37E-02 |
| Matrix metalloproteinase-3 (MMP-3)                          | -0.016 | 0.017 | 3.54E-01 | -0.031 | 0.024 | 1.96E-01 |
| Kallikrein-6 (KLK6)                                         | 0.019  | 0.022 | 3.91E-01 | 0.065  | 0.027 | 1.49E-02 |
| C-X-C motif chemokine 1 (CXCL1)                             | -0.008 | 0.023 | 7.18E-01 | 0.054  | 0.026 | 4.13E-02 |
| ST2 protein (ST2)                                           | 0.006  | 0.021 | 7.62E-01 | 0.050  | 0.026 | 5.52E-02 |

| <b>TOTAL CHOLESTEROL (TC)</b>                             |        |       |          |        |       |          |
|-----------------------------------------------------------|--------|-------|----------|--------|-------|----------|
| Kidney Injury Molecule-1 (KIM-1)                          | 0.226  | 0.022 | 5.02E-24 | 0.191  | 0.027 | 1.36E-12 |
| Galectin-3 (Gal-3)                                        | 0.161  | 0.021 | 7.24E-14 | 0.142  | 0.026 | 4.85E-08 |
| Agouti-related protein (AGRP)                             | 0.137  | 0.022 | 9.32E-10 | -0.056 | 0.027 | 3.83E-02 |
| Tissue-type plasminogen activator (t-PA)                  | 0.131  | 0.022 | 1.37E-09 | 0.020  | 0.027 | 4.48E-01 |
| Osteoprotegerin (OPG)                                     | 0.118  | 0.022 | 5.90E-08 | 0.010  | 0.027 | 7.19E-01 |
| Monocyte chemotactic protein 1 (MCP-1)                    | 0.115  | 0.022 | 1.60E-07 | 0.051  | 0.027 | 6.07E-02 |
| Fatty acid-binding protein 4 (FABP4)                      | 0.098  | 0.020 | 1.33E-06 | -0.023 | 0.025 | 3.64E-01 |
| C-X-C motif chemokine 16 (CXCL16)                         | 0.105  | 0.022 | 1.71E-06 | 0.076  | 0.027 | 4.74E-03 |
| Tissue factor (TF)                                        | 0.105  | 0.022 | 2.83E-06 | 0.081  | 0.027 | 2.85E-03 |
| Resistin (RETN)                                           | -0.098 | 0.022 | 8.33E-06 | -0.097 | 0.027 | 3.41E-04 |
| Interleukin-6 receptor subunit alpha (IL-6RA)             | 0.088  | 0.022 | 6.94E-05 | 0.022  | 0.027 | 4.12E-01 |
| Spondin-1 (SPON1)                                         | 0.086  | 0.022 | 9.50E-05 | 0.001  | 0.027 | 9.62E-01 |
| Dickkopf-related protein 1 (DKK-1)                        | 0.085  | 0.022 | 1.52E-04 | 0.035  | 0.027 | 2.01E-01 |
| Tumor necrosis factor receptor superfamily member 6 (FAS) | 0.080  | 0.022 | 2.36E-04 | -0.020 | 0.027 | 4.55E-01 |
| Interleukin-27 subunit alpha (IL27-A)                     | -0.081 | 0.023 | 3.06E-04 | -0.092 | 0.027 | 6.55E-04 |
| P-selectin glycoprotein ligand 1 (PSGL-1)                 | 0.079  | 0.022 | 4.16E-04 | 0.031  | 0.027 | 2.51E-01 |
| Follistatin (FS)                                          | 0.075  | 0.023 | 8.62E-04 | 0.082  | 0.027 | 2.44E-03 |
| E-selectin (SELE)                                         | 0.072  | 0.022 | 9.70E-04 | -0.032 | 0.027 | 2.35E-01 |
| Heparin-binding EGF-like growth factor (HB-EGF)           | 0.073  | 0.023 | 1.13E-03 | 0.032  | 0.027 | 2.35E-01 |
| Thrombomodulin (TM)                                       | 0.072  | 0.022 | 1.22E-03 | 0.029  | 0.027 | 2.77E-01 |
| Interleukin-6 (IL-6)                                      | -0.072 | 0.023 | 1.38E-03 | -0.088 | 0.027 | 1.20E-03 |
| Cathepsin D (CTSD)                                        | 0.067  | 0.023 | 3.14E-03 | -0.032 | 0.027 | 2.38E-01 |
| Pappalysin-1 (PAPPA)                                      | -0.061 | 0.021 | 4.30E-03 | -0.035 | 0.026 | 1.86E-01 |
| Platelet-derived growth factor subunit B (PDGF subunit B) | 0.064  | 0.023 | 4.31E-03 | 0.072  | 0.027 | 7.72E-03 |
| Platelet endothelial cell adhesion molecule (PECAM-1)     | 0.063  | 0.022 | 4.62E-03 | -0.018 | 0.027 | 5.12E-01 |
| Lectin-like oxidized LDL receptor 1 (LOX-1)               | 0.060  | 0.023 | 7.41E-03 | 0.072  | 0.027 | 8.06E-03 |
| Kallikrein-6 (KLK6)                                       | 0.059  | 0.022 | 7.64E-03 | 0.080  | 0.027 | 3.21E-03 |
| Proto-oncogene tyrosine-protein kinase Src (SRC)          | -0.058 | 0.023 | 1.01E-02 | 0.029  | 0.027 | 2.92E-01 |
| Tumor necrosis factor receptor 2 (TNF-R2)                 | -0.056 | 0.022 | 1.06E-02 | -0.134 | 0.027 | 6.52E-07 |

|                                                             |        |       |          |        |       |          |
|-------------------------------------------------------------|--------|-------|----------|--------|-------|----------|
| Fibroblast growth factor 23 (FGF-23)                        | 0.056  | 0.022 | 1.16E-02 | -0.043 | 0.027 | 1.16E-01 |
| Leptin (LEP)                                                | 0.044  | 0.019 | 1.96E-02 | -0.024 | 0.024 | 3.21E-01 |
| Interleukin-1 receptor antagonist protein (IL-1RA)          | -0.052 | 0.023 | 2.17E-02 | -0.075 | 0.027 | 5.32E-03 |
| CD40L receptor (CD40)                                       | 0.050  | 0.022 | 2.52E-02 | 0.054  | 0.027 | 4.63E-02 |
| Tumor necrosis factor receptor 1 (TNF-R1)                   | -0.044 | 0.022 | 4.58E-02 | -0.120 | 0.027 | 8.76E-06 |
| Growth hormone (GH)                                         | -0.040 | 0.020 | 4.69E-02 | -0.032 | 0.026 | 2.27E-01 |
| ST2 protein (ST2)                                           | 0.040  | 0.021 | 5.52E-02 | 0.031  | 0.027 | 2.42E-01 |
| Angiopoietin-1 receptor (TIE2)                              | 0.043  | 0.023 | 5.68E-02 | -0.021 | 0.027 | 4.32E-01 |
| Interleukin-16 (IL-16)                                      | 0.039  | 0.023 | 8.33E-02 | 0.013  | 0.027 | 6.27E-01 |
| Matrix metalloproteinase-3 (MMP-3)                          | -0.028 | 0.017 | 9.72E-02 | 0.070  | 0.024 | 3.91E-03 |
| Chitinase-3-like protein 1 (CHI3L1)                         | 0.025  | 0.022 | 2.62E-01 | -0.047 | 0.027 | 8.46E-02 |
| Matrix metalloproteinase-12 (MMP-12)                        | 0.024  | 0.023 | 2.82E-01 | 0.059  | 0.027 | 3.05E-02 |
| Vascular endothelial growth factor D (VEGF-D)               | 0.020  | 0.022 | 3.69E-01 | 0.036  | 0.027 | 1.74E-01 |
| Myeloperoxidase (MPO)                                       | -0.018 | 0.022 | 4.02E-01 | 0.005  | 0.027 | 8.49E-01 |
| Adrenomedullin (AM)                                         | 0.018  | 0.023 | 4.20E-01 | -0.104 | 0.027 | 1.03E-04 |
| TNF-related apoptosis-inducing ligand receptor 2 (TRAIL-R2) | -0.017 | 0.023 | 4.52E-01 | -0.100 | 0.027 | 2.29E-04 |
| Urokinase plasminogen activator surface receptor (uPAR)     | -0.016 | 0.022 | 4.71E-01 | -0.068 | 0.027 | 1.15E-02 |
| Myoglobin (MB)                                              | -0.014 | 0.020 | 4.85E-01 | -0.026 | 0.026 | 3.10E-01 |
| Growth/differentiation factor 15 (GDF-15)                   | -0.012 | 0.022 | 5.87E-01 | -0.093 | 0.027 | 5.13E-04 |
| Receptor for advanced glycosylation end products (RAGE)     | 0.012  | 0.022 | 5.93E-01 | 0.026  | 0.027 | 3.29E-01 |
| C-X-C motif chemokine 1 (CXCL1)                             | -0.011 | 0.022 | 6.22E-01 | 0.033  | 0.027 | 2.24E-01 |
| Interleukin-18 (IL-18)                                      | 0.005  | 0.022 | 8.20E-01 | -0.059 | 0.027 | 2.77E-02 |
| Renin (REN)                                                 | 0.004  | 0.022 | 8.69E-01 | 0.006  | 0.027 | 8.23E-01 |
| Placenta growth factor (PlGF)                               | 0.004  | 0.022 | 8.69E-01 | -0.083 | 0.027 | 1.78E-03 |
| Cathepsin L1 (CTSL1)                                        | 0.004  | 0.023 | 8.74E-01 | 0.022  | 0.027 | 4.23E-01 |
| Proteinase-activated receptor 1 (PAR-1)                     | -0.002 | 0.023 | 9.20E-01 | -0.141 | 0.027 | 1.71E-07 |
| Stem cell factor (SCF)                                      | -0.001 | 0.023 | 9.76E-01 | 0.018  | 0.027 | 5.01E-01 |
| C-C motif chemokine 3 (CCL3)                                | 0.000  | 0.023 | 9.91E-01 | -0.045 | 0.027 | 9.34E-02 |
|                                                             |        |       |          |        |       |          |
| <b>LDL CHOLESTEROL (LDL-C)</b>                              |        |       |          |        |       |          |
| Kidney Injury Molecule-1 (KIM-1)                            | 0.125  | 0.021 | 1.72E-09 | 0.120  | 0.027 | 7.39E-06 |

|                                                             |        |       |          |        |       |          |
|-------------------------------------------------------------|--------|-------|----------|--------|-------|----------|
| Interleukin-27 subunit alpha (IL27-A)                       | -0.128 | 0.022 | 1.01E-08 | -0.094 | 0.027 | 4.31E-04 |
| Galectin-3 (Gal-3)                                          | 0.113  | 0.021 | 6.77E-08 | 0.124  | 0.026 | 1.61E-06 |
| Agouti-related protein (AGRP)                               | 0.102  | 0.022 | 5.26E-06 | -0.067 | 0.026 | 1.11E-02 |
| Growth/differentiation factor 15 (GDF-15)                   | -0.082 | 0.018 | 5.56E-06 | -0.088 | 0.026 | 9.51E-04 |
| Tissue-type plasminogen activator (t-PA)                    | 0.092  | 0.021 | 1.02E-05 | 0.006  | 0.026 | 8.17E-01 |
| Interleukin-6 (IL-6)                                        | -0.091 | 0.022 | 2.29E-05 | -0.054 | 0.027 | 4.40E-02 |
| Fatty acid-binding protein 4 (FABP4)                        | 0.076  | 0.020 | 9.29E-05 | -0.003 | 0.025 | 8.98E-01 |
| Resistin (RETN)                                             | -0.084 | 0.022 | 1.36E-04 | -0.070 | 0.027 | 8.74E-03 |
| Tumor necrosis factor receptor 2 (TNF-R2)                   | -0.072 | 0.021 | 6.79E-04 | -0.099 | 0.027 | 2.05E-04 |
| Monocyte chemotactic protein 1 (MCP-1)                      | 0.071  | 0.021 | 8.32E-04 | 0.047  | 0.027 | 7.70E-02 |
| TNF-related apoptosis-inducing ligand receptor 2 (TRAIL-R2) | -0.067 | 0.020 | 9.67E-04 | -0.081 | 0.027 | 2.40E-03 |
| Interleukin-6 receptor subunit alpha (IL-6RA)               | 0.071  | 0.022 | 1.27E-03 | 0.006  | 0.027 | 8.14E-01 |
| C-X-C motif chemokine 16 (CXCL16)                           | 0.069  | 0.022 | 1.47E-03 | 0.047  | 0.027 | 7.67E-02 |
| Tumor necrosis factor receptor 1 (TNF-R1)                   | -0.066 | 0.021 | 1.58E-03 | -0.098 | 0.027 | 2.36E-04 |
| Pappalysin-1 (PAPPA)                                        | -0.067 | 0.021 | 1.61E-03 | -0.042 | 0.026 | 1.05E-01 |
| Chitinase-3-like protein 1 (CHI3L1)                         | -0.058 | 0.021 | 4.97E-03 | -0.097 | 0.027 | 2.78E-04 |
| Matrix metalloproteinase-3 (MMP-3)                          | -0.043 | 0.017 | 1.29E-02 | 0.030  | 0.024 | 2.09E-01 |
| Urokinase plasminogen activator surface receptor (uPAR)     | -0.048 | 0.021 | 2.06E-02 | -0.066 | 0.027 | 1.41E-02 |
| Growth hormone (GH)                                         | -0.046 | 0.020 | 2.06E-02 | -0.048 | 0.026 | 6.16E-02 |
| Leptin (LEP)                                                | 0.041  | 0.019 | 2.68E-02 | 0.003  | 0.024 | 8.96E-01 |
| Dickkopf-related protein 1 (DKK-1)                          | 0.048  | 0.022 | 2.89E-02 | 0.033  | 0.027 | 2.19E-01 |
| E-selectin (SELE)                                           | 0.047  | 0.022 | 3.20E-02 | -0.052 | 0.027 | 5.08E-02 |
| Follistatin (FS)                                            | 0.047  | 0.022 | 3.32E-02 | 0.065  | 0.027 | 1.45E-02 |
| Placenta growth factor (PIGF)                               | -0.043 | 0.020 | 3.53E-02 | -0.072 | 0.026 | 6.40E-03 |
| Adrenomedullin (AM)                                         | -0.038 | 0.020 | 6.16E-02 | -0.088 | 0.026 | 9.34E-04 |
| Spondin-1 (SPON1)                                           | 0.037  | 0.021 | 7.90E-02 | -0.008 | 0.027 | 7.60E-01 |
| Tumor necrosis factor receptor superfamily member 6 (FAS)   | 0.037  | 0.021 | 8.06E-02 | -0.007 | 0.027 | 7.86E-01 |
| Platelet-derived growth factor subunit B (PDGF subunit B)   | 0.036  | 0.023 | 1.13E-01 | 0.061  | 0.027 | 2.26E-02 |
| Heparin-binding EGF-like growth factor (HB-EGF)             | 0.035  | 0.022 | 1.17E-01 | 0.031  | 0.027 | 2.50E-01 |
| Kallikrein-6 (KLK6)                                         | 0.033  | 0.022 | 1.37E-01 | 0.060  | 0.027 | 2.40E-02 |
| Osteoprotegerin (OPG)                                       | 0.029  | 0.020 | 1.39E-01 | -0.008 | 0.027 | 7.53E-01 |

|                                                         |        |       |          |        |       |          |
|---------------------------------------------------------|--------|-------|----------|--------|-------|----------|
| Myoglobin (MB)                                          | -0.029 | 0.020 | 1.41E-01 | -0.012 | 0.026 | 6.51E-01 |
| Proteinase-activated receptor 1 (PAR-1)                 | -0.032 | 0.022 | 1.46E-01 | -0.138 | 0.026 | 1.88E-07 |
| Interleukin-1 receptor antagonist protein (IL-1RA)      | -0.032 | 0.023 | 1.53E-01 | -0.035 | 0.027 | 1.86E-01 |
| C-X-C motif chemokine 1 (CXCL1)                         | -0.032 | 0.022 | 1.57E-01 | 0.027  | 0.027 | 3.04E-01 |
| Lectin-like oxidized LDL receptor 1 (LOX-1)             | 0.029  | 0.022 | 1.87E-01 | 0.072  | 0.027 | 7.40E-03 |
| Proto-oncogene tyrosine-protein kinase Src (SRC)        | -0.029 | 0.023 | 2.05E-01 | 0.026  | 0.027 | 3.26E-01 |
| Platelet endothelial cell adhesion molecule (PECAM-1)   | 0.028  | 0.022 | 2.07E-01 | -0.037 | 0.027 | 1.66E-01 |
| P-selectin glycoprotein ligand 1 (PSGL-1)               | 0.028  | 0.022 | 2.12E-01 | 0.021  | 0.027 | 4.24E-01 |
| Fibroblast growth factor 23 (FGF-23)                    | 0.027  | 0.022 | 2.26E-01 | -0.032 | 0.027 | 2.31E-01 |
| C-C motif chemokine 3 (CCL3)                            | -0.024 | 0.022 | 2.65E-01 | -0.032 | 0.027 | 2.32E-01 |
| Myeloperoxidase (MPO)                                   | -0.024 | 0.022 | 2.82E-01 | -0.004 | 0.027 | 8.93E-01 |
| Thrombomodulin (TM)                                     | 0.023  | 0.022 | 2.83E-01 | 0.025  | 0.027 | 3.43E-01 |
| CD40L receptor (CD40)                                   | 0.021  | 0.022 | 3.43E-01 | 0.034  | 0.027 | 2.04E-01 |
| Cathepsin L1 (CTSL1)                                    | -0.019 | 0.022 | 3.93E-01 | 0.021  | 0.027 | 4.24E-01 |
| Interleukin-16 (IL-16)                                  | 0.017  | 0.022 | 4.51E-01 | 0.040  | 0.027 | 1.35E-01 |
| Renin (REN)                                             | -0.012 | 0.022 | 5.68E-01 | -0.010 | 0.026 | 7.10E-01 |
| Interleukin-18 (IL-18)                                  | 0.012  | 0.022 | 5.69E-01 | -0.049 | 0.026 | 6.27E-02 |
| Angiopoietin-1 receptor (TIE2)                          | 0.011  | 0.023 | 6.40E-01 | -0.040 | 0.027 | 1.40E-01 |
| Stem cell factor (SCF)                                  | -0.010 | 0.023 | 6.68E-01 | 0.012  | 0.027 | 6.67E-01 |
| Vascular endothelial growth factor D (VEGF-D)           | -0.008 | 0.022 | 7.31E-01 | 0.002  | 0.027 | 9.47E-01 |
| Tissue factor (TF)                                      | 0.007  | 0.021 | 7.49E-01 | -0.002 | 0.027 | 9.30E-01 |
| Cathepsin D (CTSD)                                      | 0.005  | 0.022 | 8.16E-01 | -0.042 | 0.027 | 1.11E-01 |
| Matrix metalloproteinase-12 (MMP-12)                    | 0.004  | 0.021 | 8.57E-01 | 0.101  | 0.027 | 1.66E-04 |
| ST2 protein (ST2)                                       | -0.004 | 0.021 | 8.60E-01 | -0.013 | 0.026 | 6.13E-01 |
| Receptor for advanced glycosylation end products (RAGE) | -0.001 | 0.022 | 9.59E-01 | 0.029  | 0.027 | 2.71E-01 |
|                                                         |        |       |          |        |       |          |
|                                                         |        |       |          |        |       |          |
| <b>HDL CHOLESTEROL (HDL-C)</b>                          |        |       |          |        |       |          |
| Interleukin-1 receptor antagonist protein (IL-1RA)      | -0.455 | 0.023 | 2.14E-79 | -0.331 | 0.026 | 2.99E-34 |
| Leptin (LEP)                                            | -0.271 | 0.020 | 4.54E-40 | -0.234 | 0.024 | 4.00E-21 |
| Fatty acid-binding protein 4 (FABP4)                    | -0.265 | 0.021 | 3.76E-35 | -0.259 | 0.025 | 7.96E-24 |
| Interleukin-6 (IL-6)                                    | -0.281 | 0.023 | 1.96E-32 | -0.182 | 0.027 | 4.73E-11 |

|                                                             |        |       |          |        |       |          |
|-------------------------------------------------------------|--------|-------|----------|--------|-------|----------|
| Tissue-type plasminogen activator (t-PA)                    | -0.267 | 0.023 | 3.00E-31 | -0.180 | 0.027 | 4.49E-11 |
| Tissue factor (TF)                                          | 0.260  | 0.023 | 2.89E-28 | 0.203  | 0.027 | 1.46E-13 |
| Stem cell factor (SCF)                                      | 0.273  | 0.024 | 3.11E-28 | 0.187  | 0.027 | 1.12E-11 |
| C-C motif chemokine 3 (CCL3)                                | -0.244 | 0.024 | 2.39E-24 | -0.187 | 0.027 | 1.06E-11 |
| Urokinase plasminogen activator surface receptor (uPAR)     | -0.223 | 0.022 | 5.79E-23 | -0.088 | 0.028 | 1.48E-03 |
| Tumor necrosis factor receptor 1 (TNF-R1)                   | -0.225 | 0.023 | 2.30E-22 | -0.219 | 0.027 | 1.85E-15 |
| Tumor necrosis factor receptor 2 (TNF-R2)                   | -0.221 | 0.023 | 3.00E-21 | -0.237 | 0.027 | 6.69E-18 |
| Interleukin-18 (IL-18)                                      | -0.210 | 0.024 | 1.68E-18 | -0.167 | 0.027 | 1.01E-09 |
| Placenta growth factor (PlGF)                               | -0.184 | 0.022 | 1.93E-16 | -0.164 | 0.027 | 1.61E-09 |
| Adrenomedullin (AM)                                         | -0.182 | 0.022 | 9.41E-16 | -0.174 | 0.027 | 2.54E-10 |
| Resistin (RETN)                                             | -0.195 | 0.024 | 1.10E-15 | -0.171 | 0.027 | 6.08E-10 |
| Interleukin-16 (IL-16)                                      | -0.193 | 0.024 | 2.38E-15 | -0.131 | 0.028 | 2.17E-06 |
| Matrix metalloproteinase-12 (MMP-12)                        | -0.174 | 0.023 | 2.35E-14 | -0.202 | 0.027 | 2.13E-13 |
| TNF-related apoptosis-inducing ligand receptor 2 (TRAIL-R2) | -0.156 | 0.023 | 6.14E-12 | -0.206 | 0.027 | 9.57E-14 |
| Growth hormone (GH)                                         | 0.148  | 0.022 | 1.78E-11 | 0.095  | 0.027 | 4.21E-04 |
| Cathepsin D (CTSD)                                          | -0.154 | 0.025 | 4.75E-10 | -0.164 | 0.027 | 2.84E-09 |
| Growth/differentiation factor 15 (GDF-15)                   | -0.125 | 0.020 | 4.77E-10 | -0.151 | 0.027 | 4.03E-08 |
| E-selectin (SELE)                                           | -0.140 | 0.024 | 8.00E-09 | -0.104 | 0.028 | 1.75E-04 |
| Fibroblast growth factor 23 (FGF-23)                        | -0.141 | 0.024 | 9.20E-09 | -0.154 | 0.028 | 2.60E-08 |
| Proto-oncogene tyrosine-protein kinase Src (SRC)            | -0.143 | 0.025 | 1.20E-08 | -0.015 | 0.028 | 5.78E-01 |
| Tumor necrosis factor receptor superfamily member 6 (FAS)   | -0.132 | 0.023 | 1.21E-08 | -0.105 | 0.028 | 1.54E-04 |
| Vascular endothelial growth factor D (VEGF-D)               | 0.137  | 0.024 | 2.20E-08 | 0.152  | 0.027 | 3.13E-08 |
| Lectin-like oxidized LDL receptor 1 (LOX-1)                 | -0.125 | 0.024 | 3.65E-07 | -0.067 | 0.028 | 1.59E-02 |
| Myeloperoxidase (MPO)                                       | -0.120 | 0.024 | 9.71E-07 | -0.008 | 0.028 | 7.79E-01 |
| Cathepsin L1 (CTSL1)                                        | -0.090 | 0.024 | 2.34E-04 | -0.053 | 0.028 | 5.42E-02 |
| Monocyte chemoattractant protein 1 (MCP-1)                  | -0.086 | 0.024 | 2.88E-04 | -0.017 | 0.028 | 5.48E-01 |
| Chitinase-3-like protein 1 (CHI3L1)                         | -0.083 | 0.023 | 3.02E-04 | -0.021 | 0.028 | 4.56E-01 |
| ST2 protein (ST2)                                           | 0.077  | 0.023 | 8.27E-04 | 0.074  | 0.027 | 6.47E-03 |
| Renin (REN)                                                 | -0.078 | 0.024 | 1.31E-03 | -0.066 | 0.027 | 1.70E-02 |
| Interleukin-27 subunit alpha (IL27-A)                       | 0.076  | 0.025 | 2.19E-03 | -0.046 | 0.028 | 1.02E-01 |
| Interleukin-6 receptor subunit alpha (IL-6RA)               | -0.072 | 0.025 | 3.54E-03 | -0.052 | 0.028 | 6.12E-02 |



|                                                           |        |       |          |        |       |          |
|-----------------------------------------------------------|--------|-------|----------|--------|-------|----------|
| Myoglobin (MB)                                            | -0.063 | 0.022 | 4.07E-03 | -0.064 | 0.027 | 1.67E-02 |
| Follistatin (FS)                                          | -0.061 | 0.024 | 1.20E-02 | -0.050 | 0.028 | 7.19E-02 |
| Angiopoietin-1 receptor (TIE2)                            | 0.059  | 0.025 | 1.84E-02 | -0.056 | 0.028 | 4.55E-02 |
| Kallikrein-6 (KLK6)                                       | 0.052  | 0.025 | 3.27E-02 | 0.024  | 0.028 | 3.91E-01 |
| C-X-C motif chemokine 16 (CXCL16)                         | -0.048 | 0.024 | 4.49E-02 | 0.014  | 0.028 | 6.01E-01 |
| Proteinase-activated receptor 1 (PAR-1)                   | -0.045 | 0.025 | 7.01E-02 | -0.095 | 0.028 | 6.04E-04 |
| P-selectin glycoprotein ligand 1 (PSGL-1)                 | -0.045 | 0.025 | 7.50E-02 | -0.013 | 0.028 | 6.33E-01 |
| Receptor for advanced glycosylation end products (RAGE)   | 0.043  | 0.025 | 8.35E-02 | -0.015 | 0.028 | 5.77E-01 |
| C-X-C motif chemokine 1 (CXCL1)                           | 0.035  | 0.025 | 1.65E-01 | -0.001 | 0.028 | 9.71E-01 |
| Galectin-3 (Gal-3)                                        | -0.025 | 0.023 | 2.92E-01 | -0.024 | 0.027 | 3.67E-01 |
| Osteoprotegerin (OPG)                                     | 0.023  | 0.022 | 3.09E-01 | 0.047  | 0.028 | 8.72E-02 |
| Matrix metalloproteinase-3 (MMP-3)                        | 0.015  | 0.019 | 4.44E-01 | 0.156  | 0.025 | 2.97E-10 |
| Platelet endothelial cell adhesion molecule (PECAM-1)     | 0.017  | 0.025 | 4.91E-01 | 0.021  | 0.028 | 4.55E-01 |
| Spondin-1 (SPON1)                                         | 0.016  | 0.024 | 5.09E-01 | -0.034 | 0.028 | 2.17E-01 |
| CD40L receptor (CD40)                                     | 0.014  | 0.025 | 5.70E-01 | 0.043  | 0.028 | 1.23E-01 |
| Heparin-binding EGF-like growth factor (HB-EGF)           | -0.011 | 0.025 | 6.65E-01 | -0.072 | 0.028 | 9.83E-03 |
| Pappalysin-1 (PAPPA)                                      | -0.009 | 0.024 | 6.90E-01 | -0.004 | 0.027 | 8.86E-01 |
| Platelet-derived growth factor subunit B (PDGF subunit B) | 0.009  | 0.025 | 7.28E-01 | -0.006 | 0.028 | 8.30E-01 |
| Agouti-related protein (AGRP)                             | -0.007 | 0.025 | 7.76E-01 | -0.023 | 0.028 | 4.09E-01 |
| Dickkopf-related protein 1 (DKK-1)                        | -0.007 | 0.025 | 7.84E-01 | -0.031 | 0.028 | 2.59E-01 |
| Kidney Injury Molecule-1 (KIM-1)                          | -0.005 | 0.023 | 8.25E-01 | 0.079  | 0.028 | 4.36E-03 |
| Thrombomodulin (TM)                                       | -0.004 | 0.024 | 8.76E-01 | -0.032 | 0.028 | 2.53E-01 |

**Supplementary Table II.** Non-significant associations between protein biomarkers and lipid fractions in the multivariable model.

| <b>TRIGLYCERIDES (TG)</b>                               |           |       |          |             |         |          |
|---------------------------------------------------------|-----------|-------|----------|-------------|---------|----------|
|                                                         | EpiHealth |       |          | PIVUS+ULSAM |         |          |
| Marker                                                  | Beta      | SE    | P        | Beta meta   | SE meta | P meta   |
| Tissue factor (TF)                                      | -0.051    | 0.024 | 3.05E-02 | 0.046       | 0.029   | 1.04E-01 |
| Urokinase plasminogen activator surface receptor (uPAR) | 0.101     | 0.021 | 2.61E-06 | 0.041       | 0.029   | 1.49E-01 |
| Agouti-related protein (AGRP)                           | 0.272     | 0.024 | 4.39E-29 | 0.027       | 0.028   | 3.49E-01 |
| Interleukin-6 (IL-6)                                    | 0.075     | 0.022 | 8.01E-04 | 0.024       | 0.028   | 3.89E-01 |
| Osteoprotegerin (OPG)                                   | 0.064     | 0.022 | 3.52E-03 | 0.022       | 0.028   | 4.43E-01 |
| Follistatin (FS)                                        | 0.047     | 0.024 | 5.12E-02 | 0.152       | 0.029   | 1.48E-07 |
| Growth/differentiation factor 15 (GDF-15)               | 0.032     | 0.019 | 9.37E-02 | 0.115       | 0.027   | 2.31E-05 |
| Angiopoietin-1 receptor (TIE2)                          | 0.050     | 0.025 | 4.82E-02 | 0.084       | 0.029   | 3.29E-03 |
| Proto-oncogene tyrosine-protein kinase Src (SRC)        | 0.052     | 0.025 | 3.79E-02 | 0.083       | 0.029   | 4.07E-03 |
| Spondin-1 (SPON1)                                       | 0.017     | 0.024 | 4.72E-01 | 0.076       | 0.028   | 7.29E-03 |
| Vascular endothelial growth factor D (VEGF-D)           | -0.038    | 0.024 | 1.09E-01 | -0.067      | 0.028   | 1.53E-02 |
| C-X-C motif chemokine 1 (CXCL1)                         | -0.004    | 0.025 | 8.70E-01 | 0.068       | 0.029   | 1.86E-02 |
| Receptor for advanced glycosylation end products (RAGE) | 0.038     | 0.024 | 1.13E-01 | 0.061       | 0.028   | 3.21E-02 |
| ST2 protein (ST2)                                       | 0.011     | 0.023 | 6.27E-01 | 0.059       | 0.028   | 3.62E-02 |
| Proteinase-activated receptor 1 (PAR-1)                 | 0.025     | 0.025 | 3.13E-01 | 0.051       | 0.029   | 7.64E-02 |
| Cathepsin L1 (CTSL1)                                    | 0.000     | 0.024 | 9.91E-01 | 0.047       | 0.029   | 1.03E-01 |
| Platelet endothelial cell adhesion molecule (PECAM-1)   | 0.047     | 0.025 | 5.80E-02 | 0.035       | 0.029   | 2.29E-01 |
| Pappalysin-1 (PAPPA)                                    | -0.033    | 0.023 | 1.56E-01 | 0.032       | 0.028   | 2.58E-01 |
| Myeloperoxidase (MPO)                                   | 0.046     | 0.024 | 5.85E-02 | 0.032       | 0.029   | 2.67E-01 |
| Interleukin-27 subunit alpha (IL27-A)                   | -0.027    | 0.025 | 2.74E-01 | 0.012       | 0.029   | 6.82E-01 |
| Myoglobin (MB)                                          | 0.020     | 0.022 | 3.50E-01 | 0.011       | 0.027   | 6.85E-01 |
| Matrix metalloproteinase-3 (MMP-3)                      | -0.008    | 0.019 | 6.87E-01 | 0.006       | 0.025   | 7.99E-01 |
| <b>TOTAL CHOLESTEROL (TC)</b>                           |           |       |          |             |         |          |
| Interleukin-6 receptor subunit alpha (IL-6RA)           | 0.083     | 0.023 | 2.56E-04 | 0.053       | 0.028   | 6.05E-02 |
| Agouti-related protein (AGRP)                           | 0.172     | 0.023 | 4.92E-14 | -0.050      | 0.028   | 7.47E-02 |

|                                                           |        |       |          |        |       |          |
|-----------------------------------------------------------|--------|-------|----------|--------|-------|----------|
| Fatty acid-binding protein 4 (FABP4)                      | 0.084  | 0.016 | 2.44E-07 | 0.040  | 0.022 | 7.60E-02 |
| Growth/differentiation factor 15 (GDF-15)                 | -0.063 | 0.018 | 4.48E-04 | -0.046 | 0.027 | 8.73E-02 |
| Interleukin-1 receptor antagonist protein (IL-1RA)        | -0.058 | 0.020 | 3.48E-03 | -0.037 | 0.026 | 1.48E-01 |
| Pappalysin-1 (PAPPA)                                      | -0.087 | 0.022 | 6.04E-05 | -0.039 | 0.028 | 1.58E-01 |
| P-selectin glycoprotein ligand 1 (PSGL-1)                 | 0.074  | 0.023 | 1.15E-03 | 0.034  | 0.029 | 2.32E-01 |
| Dickkopf-related protein 1 (DKK-1)                        | 0.059  | 0.023 | 1.02E-02 | 0.028  | 0.029 | 3.30E-01 |
| Spondin-1 (SPON1)                                         | 0.059  | 0.022 | 7.02E-03 | 0.026  | 0.028 | 3.41E-01 |
| Osteoprotegerin (OPG)                                     | 0.065  | 0.020 | 1.53E-03 | 0.021  | 0.028 | 4.50E-01 |
| Fibroblast growth factor 23 (FGF-23)                      | 0.057  | 0.022 | 1.00E-02 | -0.013 | 0.027 | 6.39E-01 |
| Growth hormone (GH)                                       | -0.056 | 0.020 | 5.49E-03 | -0.012 | 0.027 | 6.57E-01 |
| Platelet endothelial cell adhesion molecule (PECAM-1)     | 0.051  | 0.023 | 2.40E-02 | 0.007  | 0.029 | 8.12E-01 |
| E-selectin (SELE)                                         | 0.068  | 0.022 | 1.75E-03 | 0.005  | 0.028 | 8.59E-01 |
| Tumor necrosis factor receptor superfamily member 6 (FAS) | 0.048  | 0.021 | 2.25E-02 | -0.002 | 0.028 | 9.40E-01 |
| Proteinase-activated receptor 1 (PAR-1)                   | -0.024 | 0.023 | 2.96E-01 | -0.120 | 0.028 | 1.71E-05 |
| Follistatin (FS)                                          | 0.046  | 0.022 | 4.03E-02 | 0.101  | 0.028 | 3.83E-04 |
| Adrenomedullin (AM)                                       | -0.012 | 0.019 | 5.22E-01 | -0.087 | 0.027 | 1.41E-03 |
| Lectin-like oxidized LDL receptor 1 (LOX-1)               | 0.032  | 0.022 | 1.51E-01 | 0.081  | 0.028 | 4.29E-03 |
| Matrix metalloproteinase-12 (MMP-12)                      | -0.018 | 0.021 | 4.03E-01 | 0.070  | 0.028 | 1.24E-02 |
| Platelet-derived growth factor subunit B (PDGF subunit B) | 0.049  | 0.023 | 3.72E-02 | 0.067  | 0.029 | 1.94E-02 |
| Matrix metalloproteinase-3 (MMP-3)                        | -0.032 | 0.018 | 7.22E-02 | 0.055  | 0.025 | 2.75E-02 |
| Placenta growth factor (PIGF)                             | -0.033 | 0.021 | 1.07E-01 | -0.060 | 0.028 | 3.14E-02 |
| ST2 protein (ST2)                                         | 0.033  | 0.021 | 1.18E-01 | 0.053  | 0.028 | 5.54E-02 |
| CD40L receptor (CD40)                                     | 0.039  | 0.023 | 9.03E-02 | 0.048  | 0.029 | 9.67E-02 |
| Renin (REN)                                               | 0.044  | 0.021 | 3.73E-02 | 0.042  | 0.026 | 1.17E-01 |
| Interleukin-18 (IL-18)                                    | 0.007  | 0.022 | 7.69E-01 | -0.043 | 0.028 | 1.28E-01 |
| C-X-C motif chemokine 1 (CXCL1)                           | -0.027 | 0.023 | 2.42E-01 | 0.042  | 0.028 | 1.40E-01 |
| Heparin-binding EGF-like growth factor (HB-EGF)           | 0.049  | 0.023 | 3.29E-02 | 0.042  | 0.029 | 1.42E-01 |
| Thrombomodulin (TM)                                       | 0.049  | 0.023 | 3.09E-02 | 0.041  | 0.028 | 1.49E-01 |
| Cathepsin L1 (CTSL1)                                      | -0.013 | 0.023 | 5.67E-01 | 0.039  | 0.028 | 1.74E-01 |
| Chitinase-3-like protein 1 (CHI3L1)                       | -0.012 | 0.021 | 5.66E-01 | -0.038 | 0.028 | 1.80E-01 |
| Vascular endothelial growth factor D (VEGF-D)             | 0.013  | 0.022 | 5.70E-01 | 0.035  | 0.027 | 2.05E-01 |

|                                                           |        |       |          |        |       |          |
|-----------------------------------------------------------|--------|-------|----------|--------|-------|----------|
| Interleukin-16 (IL-16)                                    | 0.014  | 0.022 | 5.32E-01 | 0.033  | 0.028 | 2.43E-01 |
| Receptor for advanced glycosylation end products (RAGE)   | 0.009  | 0.023 | 6.95E-01 | 0.031  | 0.028 | 2.71E-01 |
| C-C motif chemokine 3 (CCL3)                              | -0.014 | 0.022 | 5.20E-01 | -0.027 | 0.028 | 3.32E-01 |
| Myeloperoxidase (MPO)                                     | -0.033 | 0.022 | 1.40E-01 | 0.025  | 0.028 | 3.75E-01 |
| Stem cell factor (SCF)                                    | -0.004 | 0.023 | 8.71E-01 | 0.018  | 0.028 | 5.24E-01 |
| Proto-oncogene tyrosine-protein kinase Src (SRC)          | -0.052 | 0.023 | 2.59E-02 | 0.015  | 0.029 | 5.98E-01 |
| Angiopoietin-1 receptor (TIE2)                            | 0.036  | 0.023 | 1.28E-01 | 0.011  | 0.028 | 7.08E-01 |
| Cathepsin D (CTSD)                                        | 0.048  | 0.022 | 2.70E-02 | 0.006  | 0.027 | 8.32E-01 |
| Myoglobin (MB)                                            | -0.019 | 0.020 | 3.33E-01 | 0.000  | 0.027 | 9.91E-01 |
| <b>LDL CHOLESTEROL (LDL-C)</b>                            |        |       |          |        |       |          |
| Urokinase plasminogen activator surface receptor (uPAR)   | -0.050 | 0.020 | 1.19E-02 | -0.053 | 0.028 | 5.42E-02 |
| Interleukin-6 (IL-6)                                      | -0.093 | 0.020 | 5.23E-06 | -0.050 | 0.027 | 6.38E-02 |
| Agouti-related protein (AGRP)                             | 0.114  | 0.023 | 4.97E-07 | -0.050 | 0.027 | 6.66E-02 |
| Pappalysin-1 (PAPPA)                                      | -0.080 | 0.021 | 2.05E-04 | -0.047 | 0.028 | 9.14E-02 |
| Growth/differentiation factor 15 (GDF-15)                 | -0.068 | 0.018 | 1.30E-04 | -0.042 | 0.027 | 1.14E-01 |
| Interleukin-6 receptor subunit alpha (IL-6RA)             | 0.074  | 0.023 | 1.08E-03 | 0.038  | 0.028 | 1.74E-01 |
| Tissue-type plasminogen activator (t-PA)                  | 0.094  | 0.019 | 1.15E-06 | 0.035  | 0.026 | 1.85E-01 |
| Leptin (LEP)                                              | 0.045  | 0.013 | 6.65E-04 | 0.022  | 0.018 | 2.17E-01 |
| Fatty acid-binding protein 4 (FABP4)                      | 0.076  | 0.016 | 2.17E-06 | 0.025  | 0.022 | 2.57E-01 |
| Matrix metalloproteinase-12 (MMP-12)                      | 0.011  | 0.021 | 5.83E-01 | 0.119  | 0.027 | 1.52E-05 |
| Proteinase-activated receptor 1 (PAR-1)                   | -0.032 | 0.023 | 1.65E-01 | -0.119 | 0.028 | 1.68E-05 |
| Follistatin (FS)                                          | 0.043  | 0.022 | 5.14E-02 | 0.087  | 0.028 | 2.09E-03 |
| Adrenomedullin (AM)                                       | -0.029 | 0.019 | 1.30E-01 | -0.082 | 0.027 | 2.32E-03 |
| Lectin-like oxidized LDL receptor 1 (LOX-1)               | 0.030  | 0.022 | 1.77E-01 | 0.080  | 0.028 | 4.27E-03 |
| Platelet-derived growth factor subunit B (PDGF subunit B) | 0.029  | 0.023 | 2.03E-01 | 0.057  | 0.028 | 4.38E-02 |
| Placenta growth factor (PlGF)                             | -0.038 | 0.020 | 6.30E-02 | -0.053 | 0.027 | 5.01E-02 |
| Interleukin-16 (IL-16)                                    | 0.014  | 0.022 | 5.19E-01 | 0.050  | 0.028 | 7.31E-02 |
| C-X-C motif chemokine 1 (CXCL1)                           | -0.040 | 0.023 | 7.98E-02 | 0.046  | 0.028 | 1.05E-01 |
| Receptor for advanced glycosylation end products (RAGE)   | 0.003  | 0.022 | 8.91E-01 | 0.042  | 0.028 | 1.23E-01 |
| Kallikrein-6 (KLK6)                                       | 0.049  | 0.022 | 2.95E-02 | 0.041  | 0.027 | 1.38E-01 |

|                                                           |        |       |          |        |       |          |
|-----------------------------------------------------------|--------|-------|----------|--------|-------|----------|
| Interleukin-18 (IL-18)                                    | 0.020  | 0.022 | 3.63E-01 | -0.039 | 0.028 | 1.61E-01 |
| Heparin-binding EGF-like growth factor (HB-EGF)           | 0.032  | 0.023 | 1.64E-01 | 0.039  | 0.028 | 1.74E-01 |
| Cathepsin L1 (CTSL1)                                      | -0.011 | 0.022 | 6.25E-01 | 0.034  | 0.028 | 2.25E-01 |
| Dickkopf-related protein 1 (DKK-1)                        | 0.039  | 0.023 | 8.47E-02 | 0.033  | 0.028 | 2.47E-01 |
| Thrombomodulin (TM)                                       | 0.023  | 0.022 | 3.07E-01 | 0.032  | 0.028 | 2.48E-01 |
| CD40L receptor (CD40)                                     | 0.017  | 0.023 | 4.64E-01 | 0.028  | 0.028 | 3.28E-01 |
| Matrix metalloproteinase-3 (MMP-3)                        | -0.040 | 0.018 | 2.44E-02 | 0.024  | 0.025 | 3.28E-01 |
| Renin (REN)                                               | 0.034  | 0.021 | 1.07E-01 | 0.024  | 0.026 | 3.64E-01 |
| E-selectin (SELE)                                         | 0.042  | 0.021 | 4.95E-02 | -0.023 | 0.027 | 3.95E-01 |
| C-C motif chemokine 3 (CCL3)                              | -0.012 | 0.022 | 5.92E-01 | -0.022 | 0.028 | 4.31E-01 |
| P-selectin glycoprotein ligand 1 (PSGL-1)                 | 0.032  | 0.023 | 1.61E-01 | 0.022  | 0.028 | 4.44E-01 |
| Interleukin-1 receptor antagonist protein (IL-1RA)        | -0.028 | 0.020 | 1.51E-01 | -0.019 | 0.026 | 4.50E-01 |
| Growth hormone (GH)                                       | -0.045 | 0.020 | 2.14E-02 | -0.020 | 0.027 | 4.55E-01 |
| Vascular endothelial growth factor D (VEGF-D)             | -0.009 | 0.022 | 6.71E-01 | 0.019  | 0.027 | 4.69E-01 |
| Cathepsin D (CTSD)                                        | 0.008  | 0.022 | 7.18E-01 | -0.018 | 0.027 | 5.03E-01 |
| Spondin-1 (SPON1)                                         | 0.043  | 0.022 | 4.67E-02 | 0.018  | 0.027 | 5.14E-01 |
| Platelet endothelial cell adhesion molecule (PECAM-1)     | 0.026  | 0.023 | 2.53E-01 | -0.015 | 0.028 | 5.94E-01 |
| ST2 protein (ST2)                                         | -0.002 | 0.021 | 9.34E-01 | 0.011  | 0.027 | 6.84E-01 |
| Myeloperoxidase (MPO)                                     | -0.033 | 0.022 | 1.33E-01 | 0.011  | 0.028 | 6.87E-01 |
| Angiopoietin-1 receptor (TIE2)                            | 0.003  | 0.023 | 8.85E-01 | -0.009 | 0.028 | 7.33E-01 |
| Proto-oncogene tyrosine-protein kinase Src (SRC)          | -0.031 | 0.023 | 1.85E-01 | 0.008  | 0.028 | 7.66E-01 |
| Tumor necrosis factor receptor superfamily member 6 (FAS) | 0.036  | 0.021 | 8.31E-02 | 0.007  | 0.028 | 7.93E-01 |
| Osteoprotegerin (OPG)                                     | 0.028  | 0.020 | 1.60E-01 | 0.007  | 0.028 | 8.13E-01 |
| Tissue factor (TF)                                        | -0.001 | 0.022 | 9.61E-01 | 0.006  | 0.028 | 8.37E-01 |
| Stem cell factor (SCF)                                    | -0.011 | 0.023 | 6.28E-01 | 0.006  | 0.028 | 8.42E-01 |
| Fibroblast growth factor 23 (FGF-23)                      | 0.041  | 0.022 | 6.64E-02 | -0.004 | 0.027 | 8.90E-01 |
| Myoglobin (MB)                                            | -0.020 | 0.020 | 3.08E-01 | 0.002  | 0.026 | 9.39E-01 |
| <b>HDL CHOLESTEROL (HDL-C)</b>                            |        |       |          |        |       |          |
| Lectin-like oxidized LDL receptor 1 (LOX-1)               | -0.095 | 0.026 | 2.74E-04 | -0.059 | 0.030 | 5.30E-02 |
| Leptin (LEP)                                              | -0.036 | 0.016 | 2.07E-02 | -0.018 | 0.020 | 3.51E-01 |

|                                                           |        |       |          |        |       |          |
|-----------------------------------------------------------|--------|-------|----------|--------|-------|----------|
| Angiopoietin-1 receptor (TIE2)                            | 0.066  | 0.028 | 1.63E-02 | -0.021 | 0.030 | 4.79E-01 |
| Proto-oncogene tyrosine-protein kinase Src (SRC)          | -0.151 | 0.027 | 3.98E-08 | -0.021 | 0.031 | 4.95E-01 |
| Matrix metalloproteinase-3 (MMP-3)                        | 0.011  | 0.021 | 5.98E-01 | 0.116  | 0.027 | 1.52E-05 |
| Adrenomedullin (AM)                                       | -0.018 | 0.023 | 4.19E-01 | -0.098 | 0.029 | 8.04E-04 |
| Tumor necrosis factor receptor superfamily member 6 (FAS) | -0.055 | 0.025 | 2.79E-02 | -0.090 | 0.030 | 3.04E-03 |
| Proteinase-activated receptor 1 (PAR-1)                   | -0.023 | 0.027 | 3.97E-01 | -0.088 | 0.030 | 3.61E-03 |
| Cathepsin D (CTSD)                                        | -0.043 | 0.026 | 9.85E-02 | -0.078 | 0.029 | 7.20E-03 |
| Dickkopf-related protein 1 (DKK-1)                        | -0.004 | 0.027 | 8.75E-01 | -0.071 | 0.031 | 2.09E-02 |
| Heparin-binding EGF-like growth factor (HB-EGF)           | -0.002 | 0.027 | 9.34E-01 | -0.063 | 0.031 | 4.20E-02 |
| Receptor for advanced glycosylation end products (RAGE)   | -0.022 | 0.027 | 3.99E-01 | -0.055 | 0.030 | 6.64E-02 |
| Agouti-related protein (AGRP)                             | -0.026 | 0.027 | 3.37E-01 | -0.050 | 0.030 | 9.27E-02 |
| Osteoprotegerin (OPG)                                     | 0.049  | 0.024 | 4.14E-02 | 0.047  | 0.030 | 1.14E-01 |
| E-selectin (SELE)                                         | -0.027 | 0.026 | 2.86E-01 | -0.042 | 0.030 | 1.62E-01 |
| Follistatin (FS)                                          | -0.025 | 0.026 | 3.36E-01 | -0.042 | 0.031 | 1.74E-01 |
| Interleukin-6 receptor subunit alpha (IL-6RA)             | -0.038 | 0.027 | 1.62E-01 | -0.041 | 0.030 | 1.79E-01 |
| Interleukin-27 subunit alpha (IL27-A)                     | 0.056  | 0.027 | 3.90E-02 | -0.036 | 0.030 | 2.33E-01 |
| CD40L receptor (CD40)                                     | 0.018  | 0.027 | 5.14E-01 | 0.035  | 0.031 | 2.48E-01 |
| Platelet endothelial cell adhesion molecule (PECAM-1)     | 0.046  | 0.027 | 8.83E-02 | 0.034  | 0.031 | 2.66E-01 |
| Thrombomodulin (TM)                                       | 0.018  | 0.027 | 5.09E-01 | -0.030 | 0.030 | 3.18E-01 |
| Cathepsin L1 (CTSL1)                                      | -0.051 | 0.027 | 5.82E-02 | -0.029 | 0.030 | 3.42E-01 |
| Myoglobin (MB)                                            | -0.030 | 0.024 | 2.06E-01 | -0.025 | 0.029 | 3.86E-01 |
| Spondin-1 (SPON1)                                         | 0.046  | 0.026 | 7.61E-02 | -0.024 | 0.030 | 4.28E-01 |
| C-X-C motif chemokine 1 (CXCL1)                           | 0.028  | 0.027 | 3.12E-01 | -0.024 | 0.031 | 4.33E-01 |
| Galectin-3 (Gal-3)                                        | 0.037  | 0.025 | 1.51E-01 | 0.022  | 0.029 | 4.45E-01 |
| C-X-C motif chemokine 16 (CXCL16)                         | 0.006  | 0.026 | 8.07E-01 | 0.022  | 0.030 | 4.64E-01 |
| Pappalysin-1 (PAPPA)                                      | -0.029 | 0.026 | 2.53E-01 | -0.022 | 0.030 | 4.69E-01 |
| Myeloperoxidase (MPO)                                     | -0.058 | 0.026 | 2.77E-02 | 0.018  | 0.031 | 5.53E-01 |
| Platelet-derived growth factor subunit B (PDGF subunit B) | 0.016  | 0.028 | 5.52E-01 | -0.016 | 0.031 | 6.14E-01 |
| Monocyte chemotactic protein 1 (MCP-1)                    | -0.050 | 0.026 | 5.16E-02 | -0.014 | 0.030 | 6.49E-01 |
| Kallikrein-6 (KLK6)                                       | 0.025  | 0.027 | 3.52E-01 | -0.012 | 0.030 | 6.87E-01 |
| Chitinase-3-like protein 1 (CHI3L1)                       | -0.015 | 0.025 | 5.49E-01 | 0.011  | 0.030 | 7.28E-01 |

|                                           |        |       |          |        |       |          |
|-------------------------------------------|--------|-------|----------|--------|-------|----------|
| P-selectin glycoprotein ligand 1 (PSGL-1) | -0.003 | 0.027 | 9.23E-01 | -0.010 | 0.031 | 7.52E-01 |
| Renin (REN)                               | -0.002 | 0.025 | 9.29E-01 | -0.004 | 0.028 | 8.81E-01 |

**Supplementary Table III.** Cis SNPs associated with protein levels at  $P < 5 \times 10^{-8}$  in EpiHealth, PIVUS, ULSAM and IMPROVE and used as genetic instruments.

| Protein | SNP         | Effect allele | Other allele | EAF   | Beta   | SE    | P         |
|---------|-------------|---------------|--------------|-------|--------|-------|-----------|
| ADM     | rs11042731  | T             | C            | 0.271 | 0.193  | 0.019 | 2.26E-25  |
|         | rs2923084   | A             | G            | 0.822 | 0.118  | 0.022 | 4.61E-08  |
| CCL3    | rs1634517   | A             | C            | 0.238 | 0.398  | 0.019 | 4.10E-97  |
| CHI3L1  | rs3087949   | A             | C            | 0.733 | 0.103  | 0.019 | 4.60E-08  |
|         | rs3766554   | A             | G            | 0.059 | 0.253  | 0.038 | 4.63E-11  |
|         | rs4950928   | C             | G            | 0.764 | 0.803  | 0.019 | 1.00E-200 |
|         | rs7539590   | A             | G            | 0.146 | 0.342  | 0.027 | 1.05E-37  |
| CSTD    | rs11038251  | A             | C            | 0.835 | 0.180  | 0.023 | 1.54E-15  |
|         | rs12283736  | A             | T            | 0.424 | 0.193  | 0.017 | 3.40E-30  |
|         | rs2292958   | T             | C            | 0.703 | 0.360  | 0.020 | 3.57E-73  |
| CXCL16  | rs7219606   | T             | C            | 0.763 | 0.187  | 0.021 | 1.21E-18  |
|         | rs8080014   | T             | C            | 0.578 | 0.146  | 0.019 | 2.60E-15  |
| Dkk-1   | rs11003049  | A             | G            | 0.120 | 0.326  | 0.034 | 2.60E-21  |
|         | rs1149779   | A             | G            | 0.511 | 0.114  | 0.017 | 1.49E-11  |
|         | rs1159798   | A             | C            | 0.231 | -0.178 | 0.029 | 5.02E-10  |
|         | rs7088799   | T             | G            | 0.592 | -0.147 | 0.017 | 4.38E-18  |
| FAS     | rs11202892  | T             | C            | 0.964 | 0.444  | 0.063 | 2.06E-12  |
|         | rs7089946   | C             | G            | 0.457 | -0.145 | 0.017 | 5.69E-18  |
|         | rs982764    | T             | C            | 0.678 | 0.279  | 0.017 | 2.76E-59  |
| Gal3    | rs142720550 | A             | G            | 0.077 | -0.886 | 0.030 | 1.30E-195 |
|         | rs17128145  | T             | G            | 0.604 | 0.219  | 0.020 | 2.09E-28  |
|         | rs3825615   | T             | C            | 0.042 | 0.265  | 0.043 | 9.69E-10  |
| GDF15   | rs17725099  | A             | G            | 0.251 | 0.163  | 0.022 | 2.49E-13  |
|         | rs62122430  | A             | T            | 0.885 | -0.390 | 0.029 | 8.60E-42  |
| IL-16   | rs4778890   | C             | G            | 0.933 | 1.195  | 0.031 | 1.00E-200 |
|         | rs859       | A             | G            | 0.717 | 0.175  | 0.020 | 8.40E-19  |
| IL-18   | rs11226647  | A             | C            | 0.767 | -0.131 | 0.023 | 2.47E-08  |
|         | rs5744258   | C             | G            | 0.766 | 0.274  | 0.019 | 2.86E-46  |
| IL-1RA  | rs10206428  | A             | G            | 0.403 | 0.219  | 0.017 | 2.41E-37  |
|         | rs6734238   | A             | G            | 0.614 | 0.295  | 0.017 | 1.88E-69  |
| IL-6RA  | rs11680     | C             | G            | 0.933 | 0.274  | 0.049 | 2.59E-08  |
|         | rs12565279  | A             | T            | 0.841 | 0.219  | 0.024 | 1.91E-19  |
|         | rs1552902   | C             | G            | 0.683 | 0.245  | 0.021 | 4.68E-32  |
|         | rs2340473   | T             | C            | 0.570 | 0.108  | 0.017 | 1.33E-10  |
|         | rs4133213   | A             | C            | 0.403 | 0.944  | 0.013 | 1.00E-200 |
| KIM-1   | rs452223    | T             | C            | 0.305 | 0.181  | 0.019 | 6.27E-22  |
|         | rs6863148   | A             | G            | 0.252 | -0.560 | 0.018 | 1.00E-200 |
|         | rs6872094   | A             | C            | 0.918 | 0.171  | 0.031 | 2.43E-08  |
|         | rs991611    | A             | G            | 0.249 | -0.123 | 0.020 | 1.26E-09  |
| KLK6    | rs1722540   | C             | G            | 0.391 | 0.222  | 0.019 | 2.55E-32  |



|          |            |   |   |       |        |       |           |
|----------|------------|---|---|-------|--------|-------|-----------|
| LOX-1    | rs10505752 | A | G | 0.169 | 0.183  | 0.030 | 1.79E-09  |
| MMP-12   | rs11225198 | A | G | 0.913 | 0.253  | 0.045 | 1.71E-08  |
|          | rs313401   | C | G | 0.620 | 0.208  | 0.020 | 1.35E-24  |
|          | rs473238   | T | C | 0.168 | -0.632 | 0.021 | 1.00E-200 |
|          | rs629946   | A | G | 0.048 | 0.409  | 0.040 | 7.26E-25  |
| PIGF     | rs175037   | C | G | 0.532 | -0.167 | 0.017 | 9.14E-22  |
| PSGL-1   | rs11829928 | A | G | 0.021 | -1.838 | 0.074 | 1.73E-137 |
| REN      | rs3014620  | T | C | 0.975 | -0.669 | 0.085 | 3.22E-15  |
| RETN     | rs1423096  | T | C | 0.109 | 0.308  | 0.043 | 1.01E-12  |
| SELE     | rs3917434  | T | C | 0.682 | -0.137 | 0.019 | 3.88E-13  |
| ST2      | rs10208293 | A | G | 0.278 | 0.324  | 0.018 | 4.41E-74  |
|          | rs17776702 | A | G | 0.980 | -0.335 | 0.060 | 2.77E-08  |
|          | rs3917265  | T | C | 0.481 | 0.154  | 0.016 | 7.87E-21  |
|          | rs4399750  | T | C | 0.485 | 0.595  | 0.015 | 1.00E-200 |
|          | rs75372018 | A | G | 0.975 | 0.439  | 0.076 | 8.89E-09  |
| TF       | rs11165186 | A | C | 0.848 | -0.222 | 0.032 | 1.72E-12  |
|          | rs11808528 | A | G | 0.375 | 0.213  | 0.020 | 5.91E-26  |
| TM       | rs3176123  | T | G | 0.797 | -0.451 | 0.020 | 1.94E-114 |
|          | rs6076034  | A | G | 0.383 | 0.130  | 0.024 | 2.97E-08  |
| TNF-R1   | rs1800693  | T | C | 0.599 | 0.093  | 0.017 | 3.16E-08  |
| TNF-R2   | rs5745994  | T | C | 0.037 | -0.498 | 0.046 | 2.76E-27  |
| TRAIL-R2 | rs13265018 | A | G | 0.080 | -0.527 | 0.042 | 1.97E-36  |
| uPAR     | rs4251938  | T | C | 0.884 | 0.214  | 0.030 | 2.27E-12  |

**Supplementary Table IV.** Results from GWAS Catalog search for the five biomarkers associated with all lipid fractions.

| BIOMARKER | DISEASE/TRAIT            | REGION | REPORTED GENE(S) | MAPPED GENE    | STRONGEST SNP-RISK ALLELE | P        | OR or BETA | 95% CI (TEXT)                    | PUBMED ID |
|-----------|--------------------------|--------|------------------|----------------|---------------------------|----------|------------|----------------------------------|-----------|
| KIM-1     | Triglycerides            | 5q33.3 | TIMD4, HAVCR1    | HAVCR1         | rs1553318-C               | 2.00E-11 | 0.04       | [0.03-0.05]<br>s.d. increase     | 25961943  |
|           | LDL cholesterol          | 5q33.3 | TIMD4, HAVCR1    | TIMD4 - HAVCR1 | rs1501908-G               | 1.00E-11 | 0.07       | [0.03-0.11]<br>s.d. decrease     | 19060906  |
|           | Cholesterol, total       | 5q33.3 | TIMD4, HAVCR1    | HAVCR1         | rs1553318-C               | 2.00E-21 | 0.06       | [0.05-0.07]<br>s.d. increase     | 25961943  |
|           | LDL cholesterol          | 5q33.3 | TIMD4, HAVCR1    | HAVCR1         | rs1553318-C               | 2.00E-15 | 0.05       | [0.04-0.06]<br>s.d. increase     | 25961943  |
|           | Platelet count           | 5q33.3 | intergenic       | HAVCR1         | rs2862064-G               | 8.00E-10 | 0.03       | [0.02-0.04]<br>unit decrease     | 27863252  |
|           | LDL cholesterol          | 5q33.3 | TIMD4, HAVCR1    | TIMD4 - HAVCR1 | rs6882076-T               | 2.00E-22 | 1.67       | [1.30-2.04]<br>mg/dL<br>decrease | 20686565  |
|           | Triglycerides            | 5q33.3 | TIMD4, HAVCR1    | TIMD4 - HAVCR1 | rs6882076-G               | 4.00E-12 | 2.63       | [1.87-3.39]<br>mg/dL<br>decrease | 20686565  |
|           | Cholesterol, total       | 5q33.3 | TIMD4, HAVCR1    | TIMD4 - HAVCR1 | rs6882076-T               | 7.00E-28 | 1.98       | [1.59-2.37]<br>mg/dL<br>decrease | 20686565  |
|           | LDL cholesterol levels   | 5q33.3 | TIMD4            | TIMD4 - HAVCR1 | rs6882076-T               | 1.00E-33 | 0.05       | [0.04-0.05]<br>unit decrease     | 28334899  |
|           | Total cholesterol levels | 5q33.3 | TIMD4            | TIMD4 - HAVCR1 | rs6882076-T               | 2.00E-43 | 0.05       | [0.04-0.06]<br>unit decrease     | 28334899  |

|        |                             |          |                        |                |                           |          |      |                           |          |
|--------|-----------------------------|----------|------------------------|----------------|---------------------------|----------|------|---------------------------|----------|
|        | LDL cholesterol             | 5q33.3   | TIMD4                  | TIMD4 - HAVCR1 | rs6882076-T               | 3.00E-31 | 0.05 | [NR] unit decrease        | 24097068 |
|        | Cholesterol, total          | 5q33.3   | TIMD4                  | TIMD4 - HAVCR1 | rs6882076-T               | 5.00E-41 | 0.05 | [NR] unit decrease        | 24097068 |
|        | Triglycerides               | 5q33.3   | TIMD4                  | TIMD4 - HAVCR1 | rs6882076-T               | 2.00E-15 | 0.03 | [NR] mg/dL decrease       | 24097068 |
| TNF-R1 | Primary biliary cholangitis | 12p13.31 | TNFRSF1A               | TNFRSF1A       | rs1800693-C               | 2.00E-09 | 1.22 | [1.14-1.30]               | 21399635 |
|        | Primary biliary cirrhosis   | 12p13.31 | TNFRSF1A, LTBR, SCNN1A | TNFRSF1A       | rs1800693-G               | 1.00E-14 | 1.27 | [1.19-1.34]               | 22961000 |
|        | Multiple sclerosis          | 12p13.31 | TNFRSF1A               | TNFRSF1A       | rs1800693-C               | 2.00E-11 | 1.20 | [1.10-1.31]               | 19525953 |
|        | Primary biliary cholangitis | 12p13.31 | TNFRSF1A, PLEKHG6      | TNFRSF1A       | rs1800693-C               | 2.00E-09 | 1.22 | NR                        | 26394269 |
|        | Primary biliary cirrhosis   | 12p13.31 | TNFRSF1A, LTBR, SCNN1A | TNFRSF1A; LTBR | rs1800693-G; rs11064157-A | 2.00E-16 | 1.58 |                           | 22961000 |
|        | Primary biliary cirrhosis   | 12p13.31 | TNFRSF1A, LTBR, SCNN1A | TNFRSF1A; LTBR | rs1800693-A; rs11064157-C | 7.00E-19 | 0.74 |                           | 22961000 |
|        | Primary biliary cirrhosis   | 12p13.31 | TNFRSF1A, LTBR, SCNN1A | LTBR           | rs11064157-A              | 2.00E-09 | 1.23 | [1.15-1.32]               | 22961000 |
|        | Primary biliary cholangitis | 12p13.31 | TNFRSF1A               | TNFRSF1A       | rs4149576-A               | 4.00E-09 | 1.37 | [1.23-1.52]               | 28425483 |
|        | Lymphocyte counts           | 12p13.31 | TNFRSF1A               | TNFRSF1A       | rs2284344-C               | 1.00E-09 | 0.02 | [0.02-0.03] unit decrease | 27863252 |
|        | Monocyte count              | 12p13.31 | TNFRSF1A               | TNFRSF1A       | rs4149577-A               | 1.00E-16 | 0.03 | [0.02-0.04] unit decrease | 27863252 |

|                                                                                                                                                     |          |                           |              |              |          |      |                              |          |
|-----------------------------------------------------------------------------------------------------------------------------------------------------|----------|---------------------------|--------------|--------------|----------|------|------------------------------|----------|
| Ankylosing spondylitis                                                                                                                              | 12p13.31 | LTBR, TNFRSF1A            | TNFRSF1A     | rs1860545-C  | 3.00E-10 | 1.13 |                              | 23749187 |
| Plateletcrit                                                                                                                                        | 12p13.31 | TNFRSF1A                  | TNFRSF1A     | rs2284344-C  | 2.00E-16 | 0.03 | [0.02-0.04]<br>unit decrease | 27863252 |
| Platelet count                                                                                                                                      | 12p13.31 | TNFRSF1A                  | TNFRSF1A     | rs2284344-C  | 5.00E-09 | 0.02 | [0.01-0.03]<br>unit decrease | 27863252 |
| Ankylosing spondylitis                                                                                                                              | 12p13.31 | LTBR, TNFRSF1A            | TNFRSF1A     | rs1860545-C  | 8.00E-10 | 1.13 |                              | 23749187 |
| Crohn's disease                                                                                                                                     | 12p13.31 | CD27,<br>TNFRSF1A, LTBR   | LTBR         | rs7954567-A  | 1.00E-09 | 1.09 | [1.06-1.11]                  | 26192919 |
| Chronic inflammatory diseases (ankylosing spondylitis, Crohn's disease, psoriasis, primary sclerosing cholangitis, ulcerative colitis) (pleiotropy) | 12p13.31 | TNFRSF1A                  | TNFRSF1A     | rs1860545-?  | 3.00E-17 |      |                              | 26974007 |
| Colorectal cancer                                                                                                                                   | 12p13.31 | PLEKHG6,<br>TNFRSF1A, CD9 | LOC105369625 | rs10849432-T | 6.00E-10 | 1.14 | [1.09-1.18]                  | 24836286 |
| Multiple sclerosis                                                                                                                                  | 12p13.31 | TNFRSF1A                  | TNFRSF1A     | rs1800693-G  | 7.00E-28 | 1.14 |                              | 24076602 |
| Multiple sclerosis                                                                                                                                  | 12p13.31 | TNFRSF1A                  | TNFRSF1A     | rs1800693-G  | 4.00E-14 | 1.12 | [1.11-1.14]                  | 21833088 |
| Ankylosing spondylitis                                                                                                                              | 12p13.31 | LTBR-TNFRSF1A             | LOC105369628 | rs11616188-A | 4.00E-12 |      |                              | 21743469 |

|          |                                 |         |                                                                          |                       |             |          |      |                           |          |
|----------|---------------------------------|---------|--------------------------------------------------------------------------|-----------------------|-------------|----------|------|---------------------------|----------|
| TNF-R2   | Tuberculosis                    | 1p36.22 | CLCN6, MTHFR, NPPA, NPPB, KIAA2013, PLOD1, MFN2, MIIP, TNFRSF8, TNFRSF1B | MFN2                  | rs4240897-? | 1.00E-11 | 1.27 | [1.20-1.33]               | 29036319 |
| TRAIL-R2 | Renal cell carcinoma            | 8p21.3  | TNFRSF10B, RHOBTB2                                                       | LOC107986927, RHOBTB2 | rs2241261-T | 6.00E-09 | 1.10 | [1.06-1.13]               | 28598434 |
| RETN     | Resistin levels                 | 19p13.2 | RETN                                                                     | LOC107985274 - RETN   | rs3219175-A | 2E-858   | 7.53 | [7.29-7.77] unit increase | 27664181 |
|          | Resistin levels                 | 19p13.2 | RETN                                                                     | RETN - MCEMP1         | rs1423096-T | 2E-209   | 4.79 | [4.50-5.08] unit increase | 27664181 |
|          | Cerebrospinal fluid RETN levels | 19p13.2 | NR                                                                       | LOC107985274 - RETN   | rs3219175-? | 6.00E-39 |      |                           | 28031287 |
|          | Menarche (age at onset)         | 19p13.2 | EVI5L, RETN                                                              | EVI5L                 | rs652260-T  | 1.00E-08 | 0.03 | [0.02-0.04] unit increase | 25231870 |
