# Supplementary material
Source: PubMed Central journal article supplement (PMC6205762)
Supplement: NIHMS1503243-supplement-Graphic_Abstract.pdf [file NIHMS1503243-supplement-Graphic_Abstract.pdf]

57 proteins: cytokines, enzymes, growth factors, hormones and receptors

Discovery: EpiHealth  
N=2,029

FDR < 5%

Validation: PIVUS+ULSAM  
N=1,341

P < 0.05

### REPLICATED RESULTS

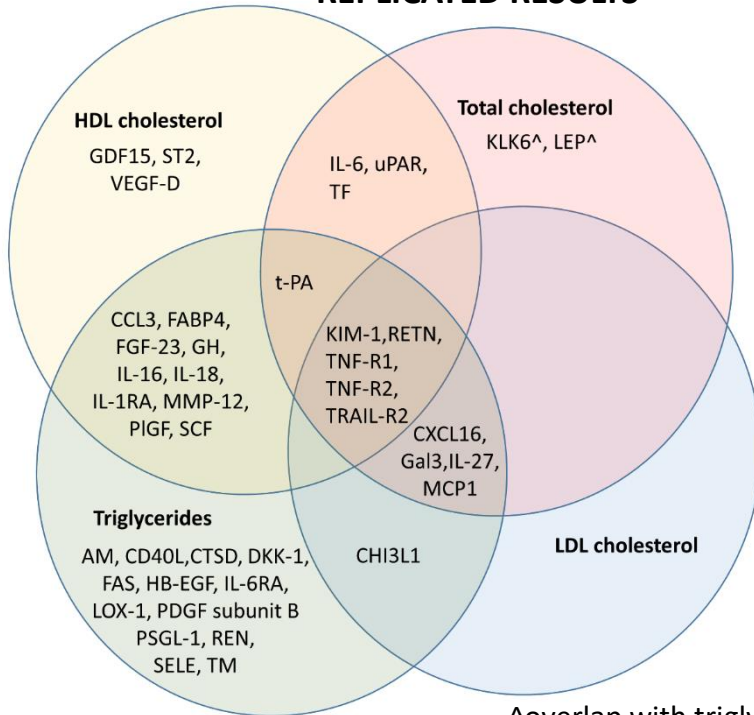

<sup>^</sup>overlap with triglycerides
